# Supplementary material for: Feature weight estimation for gene selection: a local hyperlinear learning approach
Source: Springer Nature journal article supplement (doi:10.1186/1471-2105-15-70), 2014-03-13
Supplement: 12859_2013_6823_MOESM2_ESM.pdf [file 12859_2013_6823_MOESM2_ESM.pdf]

## S.2: Pseudo-code for LHR

**Algorithm 1:** LHR ALGORITHM( $V, W, \lambda$ )

**comment:** Variables initialization:  $\mathbf{w} = \frac{1}{T}$ , stopping

criteria  $\epsilon$ , number of iterations  $T$

**for**  $t \leftarrow 1$  **to**  $T$

**while**  $\|\mathbf{w}^{(t+1)} - \mathbf{w}^{(t)}\| > \epsilon$

**do**  $\left\{ \begin{array}{l} 1. \text{ Estimate the coefficients for hyperplane of} \\ \text{nearestmiss and hit } \boldsymbol{\alpha}, \boldsymbol{\beta}; \\ 2. \text{ Calculate the margin by Eq .S.1.7, conditional on the} \\ \text{estimated feature weights in } t \text{ step;} \\ 3. \text{ Update the weights by Eq. S.1.8, conditional on the} \\ \text{estimated hyperplane coefficients.} \end{array} \right.$

**return** ( $\mathbf{w}$ )
