# Supplementary material for: Feature weight estimation for gene selection: a local hyperlinear learning approach
Source: Springer Nature journal article supplement (doi:10.1186/1471-2105-15-70), 2014-03-13

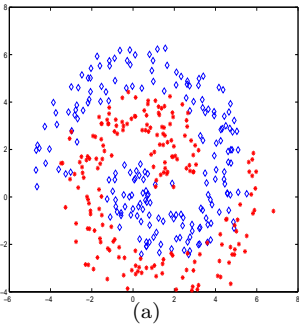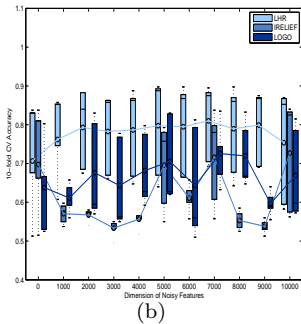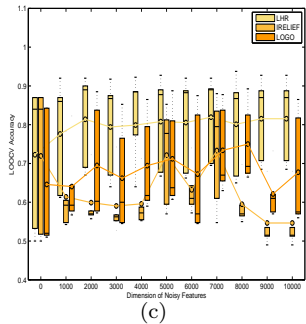

Supplement: 12859_2013_6823_MOESM3_ESM.pdf [file 12859_2013_6823_MOESM3_ESM.pdf]
