# Supplementary material for: Feature weight estimation for gene selection: a local hyperlinear learning approach
Source: Springer Nature journal article supplement (doi:10.1186/1471-2105-15-70), 2014-03-13
Supplement: 12859_2013_6823_MOESM10_ESM.pdf [file 12859_2013_6823_MOESM10_ESM.pdf]

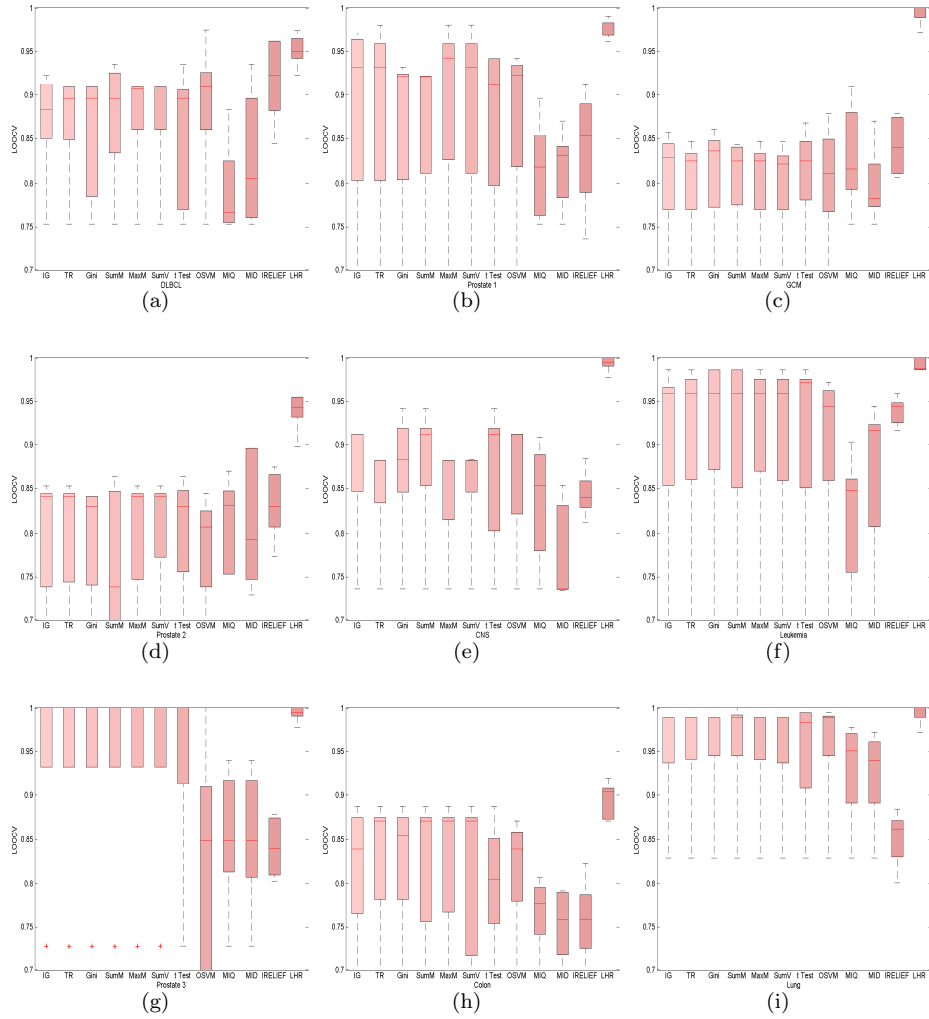

Figure 2: Performance comparison of the LHR with 11 standard feature selection schemes (FSSs). For each tested data, the results after five classification, coupling with 12 FSSs through LOOCV are boxplotted. In most cases, the proposed LHR achieved the highest accuracy. Moreover, the results after LHR show small variation on LOOCV error when tested with different classifiers, implying a high degree of robustness.
